# Supplementary material for: Insights into the spontaneous formation of hybrid PdOx/PEDOT films: electroless deposition and oxygen reduction activity
Source: Royal Society of Chemistry journal article supplement (doi:10.1039/c8ra03505a), 2018-01-01
Supplement: c8ra03505a1.pdf [file c8ra03505a1.pdf]

Supplementary Information:

## Insights into the spontaneous formation of hybrid PdO<sub>x</sub>/PEDOT films: electroless deposition and oxygen reduction activity

*Julian A. Vigil,<sup>a</sup> Michael T. Brumbach,<sup>b</sup> Jonathon Duay,<sup>a</sup> and Timothy. N. Lambert\*<sup>a</sup>*

<sup>a</sup> Department of Materials, Devices & Energy Technologies, Sandia National Laboratories, Albuquerque, New Mexico 87185, USA.

<sup>b</sup> Materials Characterization & Performance, Sandia National Laboratories, Albuquerque, New Mexico 87185, USA.

\* E-mail: [tnlambe@sandia.gov](mailto:tnlambe@sandia.gov); Tel.: +1 505 284 6967.

## Table of Contents:

|                          |       |    |
|--------------------------|-------|----|
| Characterization Methods | ..... | 3  |
| Fig. S1                  | ..... | 7  |
| Fig. S2                  | ..... | 8  |
| Fig. S3                  | ..... | 9  |
| Table S1                 | ..... | 10 |
| Table S2                 | ..... | 10 |
| Fig. S4                  | ..... | 11 |
| Fig. S5                  | ..... | 12 |
| Fig. S6                  | ..... | 13 |
| Fig. S7                  | ..... | 14 |
| Table S3                 | ..... | 15 |
| References               | ..... | 16 |

## Characterization Methods:

*Electrochemical Characterization.* r-PEDOT and PdO<sub>x</sub>/PEDOT films were deposited on the disk of GC disk/Au ring rotating ring disk working electrodes (disk area = 0.2475 cm<sup>2</sup>, ring area = 0.1866 cm<sup>2</sup>; Pine Research Instrumentation) and transferred to a three-electrode cell directly from the water bath following the preparation described above. The r-PEDOT or PdO<sub>x</sub>/PEDOT working electrode was accompanied by a graphite rod counter electrode and standard calomel reference electrode (sat. KCl, +0.244 V vs. NHE; Hach). All experiments were carried out in a glass cell, controlled by the MSR rotator unit and WaveDriver 20 Bipotentiostat (Pine Research Instrumentation).

For cyclic voltammetry (CV) studies, the potential of the working electrode was cycled at a scan rate of 50 mV s<sup>-1</sup> (beginning in the cathodic direction) with no rotation in 0.1 M KOH. The electrolyte was bubbled with pure Ar or O<sub>2</sub> gas as noted for 20 min. prior to the experiment and blanketed throughout. For comparative CV studies in the presence of O<sub>2</sub>, the films were cycled 10 times in Ar prior to bubbling the electrolyte with O<sub>2</sub> and proceeding with the same film. The active electrochemical surface area (ECSA) of Pd species on the PdO<sub>x</sub>/PEDOT electrode was calculated using the integral area of the oxide reduction wave ( $E_p \approx 0.6$  V vs. RHE) in the CV according to Eq. S1 and Eq. S2,

$$Q = \frac{1}{\nu} \int_{E_1}^{E_2} I dE \quad (S1)$$

$$ECSA = \frac{Q}{Q_r} \quad (S2)$$

where Q is charge,  $\nu$  is scan rate, E is potential, and I is current. A standard reference value ( $Q_r$ ) of 0.42 mC cm<sup>-2</sup> is used for the charge density associated with a monolayer coverage of O on Pd.<sup>1</sup>

The oxygen reduction reaction (ORR) activity of PEDOT, PdO<sub>x</sub>/PEDOT, and commercial 20% Pt/C was investigated by linear scanning voltammetry (LSV) using hydrodynamic rotating ring disk electrode (RRDE) methods. The PEDOT and PdO<sub>x</sub>/PEDOT electrodes were used directly in the cell as described above. 20% Pt/C films were prepared by drop-casting a 10  $\mu$ L aliquot of

catalyst ink (2.5 mg 20% Pt/C:0.75 mL DI H<sub>2</sub>O:0.2 mL IPA:0.05 mL Nafion soln.) after 20 min sonication on the polished disk of the working electrode (mass loading = 101 μg cm<sup>-2</sup> = 20 μg<sub>Pt</sub> cm<sup>-2</sup>). LSV scans were completed at a rate of 10 mV s<sup>-1</sup>, scanning from 0.2 to -1.0 V vs. SCE in a sequence with increasing rotation rates: 400, 900, 1600, 2500, 3600 RPM. The 0.1 M KOH electrolyte was bubbled with pure Ar or O<sub>2</sub> gas prior for 20 min. prior to the respective experiment and blanketed throughout. For each set of LSV scans, background current measured in O<sub>2</sub>-free (Ar) environment was subtracted from the corresponding catalytic current in the presence of O<sub>2</sub> prior to analysis. Half-wave potential (E<sub>1/2</sub>) was calculated using limiting current density defined as the measured disk current at 0.2 V vs. RHE; onset potential was calculated using the tangential method, as previously reported.<sup>2</sup> The collection efficiency (N) of the RRDE GC/Au working electrode was determined to be 0.36 using the [Fe(CN)<sub>6</sub>]<sup>3-/4-</sup> couple. The ORR electron transfer number (n) and fraction of peroxide generation (f<sub>p</sub>) were calculated from the background-subtracted disk current (i<sub>d</sub>) and ring current (i<sub>r</sub>) according to Eq. S3 and Eq. S4, respectively:

$$n = \frac{4 \cdot i_d}{\frac{i_r}{N} + i_d} \quad (\text{S3})$$

$$f_p = \frac{2 \cdot \frac{i_r}{N}}{\frac{i_r}{N} + i_d} \quad (\text{S4})$$

n and the kinetic rate constant (k) were also calculated using Koutecky-Levich (K-L) analysis with the ORR LSVs recorded at each rotation rate. The slope and intercept of linear fits of the K-L plots (inverse current vs. inverse square root of the rotation rate) from 0.2 V to 0.7 V vs. RHE were used to solve the K-L equation,

$$\frac{1}{j} = \frac{1}{j_{lim}} + \frac{1}{j_k} = \frac{1}{0.62nFC_0(D_0)^{\frac{2}{3}}\nu^{-\frac{1}{6}}\omega^{\frac{1}{2}}} + \frac{1}{nFkC_0} \quad (\text{S5})$$

where j is current density, j<sub>lim</sub> is limiting current density, j<sub>k</sub> is kinetic current density, F is the Faraday constant (96485 C mol<sup>-1</sup>), C<sub>0</sub> is the concentration of dissolved O<sub>2</sub> (1.2 x 10<sup>-6</sup> mol cm<sup>-3</sup>), D<sub>0</sub> is the diffusion coefficient of O<sub>2</sub> (1.9 x 10<sup>-5</sup> cm<sup>2</sup> s<sup>-1</sup>), ν is the kinematic viscosity of the electrolyte (1.1 x 10<sup>-2</sup> cm<sup>2</sup> s<sup>-1</sup>), and ω is the rotation rate.<sup>3</sup> ORR kinetic current (i<sub>k</sub>) was calculated using a limiting current (i<sub>lim</sub>) value taken at 0.2 V vs. RHE from the background-subtracted i<sub>d</sub> at 2500 RPM according to Eq. S6:

$$i_k = \frac{i_d * i_{lim}}{i_{lim} - i_d} \quad (S6)$$

Specific  $j_k$  was calculated from  $i_k$  using the ECSA ( $1.05 \text{ cm}^2$ ) and average mass loading ( $3.185 \text{ } \mu\text{g}$ ) of Pd species from CV studies and combined quartz crystal microbalance/elemental analysis, respectively.

Stability of the 20% Pt/C and PdO<sub>x</sub>/PEDOT electrodes was assessed by electrolysis at 0.8 V vs. RHE for 3 h at 2500 RPM. The 0.1 M KOH electrolyte was gently purged with O<sub>2</sub> throughout the experiment. The first five minutes of CPE was used as equilibration time for the electrode, thus  $i$  at  $t = 5 \text{ min}$  was used as initial current ( $i_0$ ) in measuring the chronoamperometric response.

*Quartz Crystal Microbalance (QCM) Measurements.* The mass of the film was monitored during electropolymerization and electroless deposition of Pd using a Maxtek RQCM Quartz Crystal Microbalance Research System (Inficon) with the three-electrode cell and Solartron 1287 Potentiostat described above. A 1 in. AT-Cut, 9 MHz Ti/Pt quartz crystal (Inficon) cleaned with detergent, dried under Ar flow, and housed in a CHK-100 Kynar<sup>®</sup> crystal holder (Inficon) acted as the working electrode and piezoelectric sensing crystal. The intrinsic capacitance of the crystal assembly and connection to the instrument were accounted for by cancellation while submerged in CH<sub>3</sub>CN prior to each measurement (no significant change in capacitance was observed upon transferring the crystal from CH<sub>3</sub>CN to aqueous solutions). For QCM studies, a 60-s open circuit potential (OCP) segment was added prior to the electropolymerization procedure, which otherwise proceeded as described above. The mass change associated with electroless deposition was normalized to the minimum mass reached within 60 s after being transferred to the aqueous deposition solution, which signaled the onset of Pd uptake. Mass change ( $\Delta m$ ) was calculated from measured crystal frequency change ( $\Delta f$ ) according to the Sauerbrey Equation (Eq. S7),

$$\Delta f = -\frac{2nf_0^2}{\sqrt{\rho_q \mu_q}} \Delta m = -C_f \Delta m \quad (S7)$$

where  $n$  is the harmonic number,  $f_0$  is the resonant frequency,  $\rho_q$  is the density of quartz, and  $\mu_q$  is the shear modulus of the quartz crystal, which simplify to the sensitivity factor,  $C_f$  ( $0.1834 \text{ Hz ng}^{-1} \text{ cm}^{-2}$  for the 9 MHz crystal used here at  $20^\circ \text{C}$ ).

*X-Ray Photoelectron Spectroscopy (XPS).* X-ray photoelectron spectroscopy was performed with a Kratos AXIS Supra instrument. Base pressures were less than  $5 \cdot 10^{-9}$  Torr. Excitation was from a monochromatic Al K $\alpha$  (1486.7 eV) X-ray source operating at 75 W for survey spectra at 160 eV pass energy. For high resolution spectra, the X-ray source was operated at 150 W and a 20 eV pass energy was utilized. The analyzed spot was an elliptical area of 300 x 700 microns. The sample electrodes were grounded, however, to compensate for differential charging effects, charge neutralization was achieved using low energy electrons supplied from a filament above the sample. Data analysis was performed in CasaXPS.

*Inductively Coupled Plasma Mass Spectrometry (ICP-MS) Measurements.* Approximately 300 mg PdO $_x$ /PEDOT samples deposited on a GC electrode (on SiO $_2$ ) were removed from the electrode and digested in fresh aqua regia (1 mol HNO $_3$ : 3 mol HCl). The digested solutions were then diluted 100-fold with 2% nitric acid. The diluted solutions, along with palladium standard solutions, were analyzed using a NexION 350D ICP-MS instrument (Perkin Elmer) utilizing germanium as an internal standard.

*Scanning Electron Microscopy/Energy Dispersive Spectroscopy (SEM/EDS).* r-PEDOT and PEDOT/PdO $_x$  films were deposited on GC electrodes on SiO $_2$  substrates. High resolution SEM imaging was performed on a FEI Nova 600 Nanolab field emission source microscope using a through lens detector. EDS mapping was acquired on a Tescan Vega-3 LMU Tungsten Filament microscope using a TEAM EDAX Analysis System. All samples were sputter coated with platinum prior to SEM/EDS analysis.

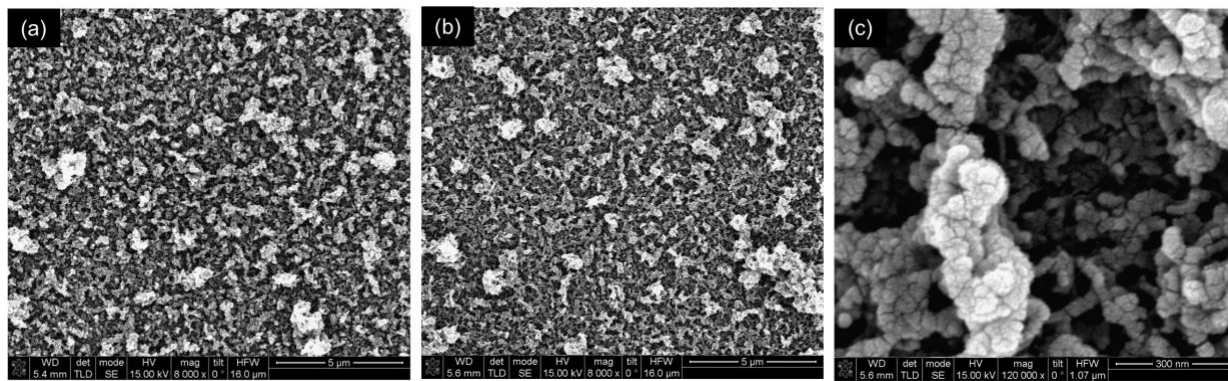

**Fig. S1** SEM images of a PdO<sub>x</sub>/PEDOT film in low magnification (a) and a r-PEDOT film in low (b) and high (c) magnification.

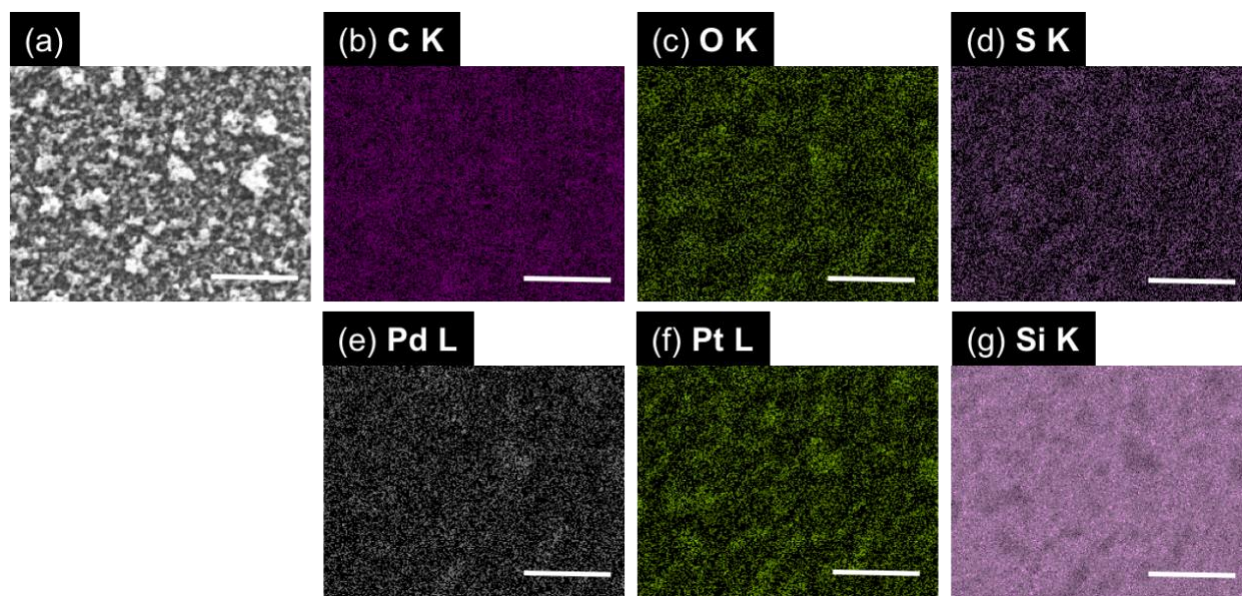

**Fig. S2** SEM and EDS elemental mapping of a PdO<sub>x</sub>/PEDOT film as-deposited on a GC electrode. Pt and Si content are attributed to sputter coating and the electrode substrate, respectively.



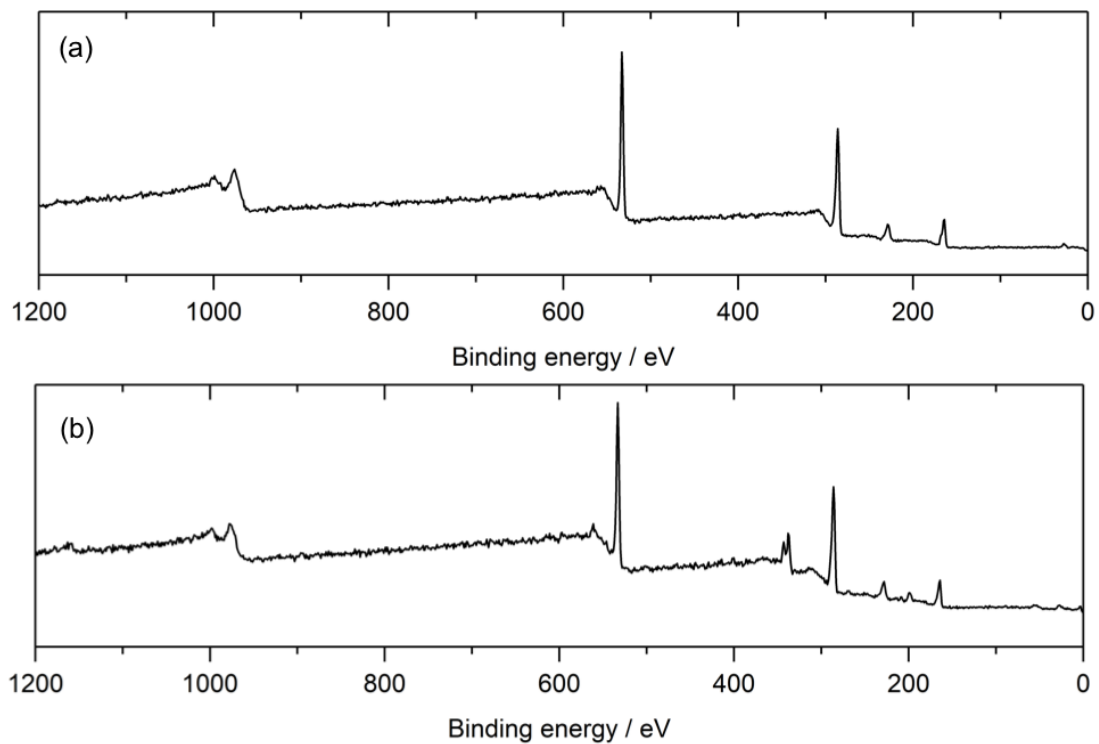

**Fig. S3** Representative XPS survey spectra for the r-PEDOT (a) and PdO<sub>x</sub>/PEDOT (b) films as-deposited on GC electrodes.

**Table S1** Binding Energies and Fit FWHM for Pd 3d, O 1s, C 1s and S 2p Core Level Electron Peaks Measured by XPS

|       | BE (eV)<br>r-PEDOT | FWHM<br>r-PEDOT | BE (eV)<br>PdO <sub>x</sub> /PEDOT | FWHM<br>PdO <sub>x</sub> /PEDOT |
|-------|--------------------|-----------------|------------------------------------|---------------------------------|
| Pd 3d | *                  | *               | 336.02 ± 0.15                      | 1.47 ± 0.12                     |
|       |                    |                 | 337.78 ± 0.05                      | 1.38 ± 0.12                     |
|       |                    |                 | 338.77 ± 0.14                      | 1.60                            |
|       |                    |                 | 341.15 ± 0.10                      | 1.47 ± 0.12                     |
|       |                    |                 | 343.04 ± 0.05                      | 1.38 ± 0.12                     |
|       |                    |                 | 344.50 ± 0.17                      | 1.60                            |
| O 1s  | 531.74 ± 0.02      | 1.62 ± 0.04     | 531.71 ± 0.06                      | 1.69 ± 0.05                     |
|       | 533.30 ± 0.01      | 1.59 ± 0.01     | 533.30 ± 0.02                      | 1.64 ± 0.04                     |
|       | 535.00             | 2.00 ± 0.01     | 535.00                             | 1.98 ± 0.05                     |
|       |                    |                 | 536.91 ± 0.09                      | 1.87 ± 0.15                     |
| C 1s  | 285.00             | 1.11 ± 0.01     | 285.00                             | 1.14 ± 0.03                     |
|       | 286.52 ± 0.01      | 1.67 ± 0.01     | 286.45 ± 0.02                      | 1.65 ± 0.05                     |
|       | 288.70 ± 0.04      | 2.39 ± 0.05     | 288.60 ± 0.09                      | 2.57 ± 0.18                     |
| S 2p  | 164.01 ± 0.01      | 0.85 ± 0.01     | 163.99 ± 0.03                      | 0.91 ± 0.02                     |
|       | 164.95 ± 0.03      | 0.85 ± 0.01     | 164.97 ± 0.04                      | 0.91 ± 0.02                     |
|       | 165.47 ± 0.01      | 0.92 ± 0.03     | 165.47 ± 0.03                      | 1.00                            |
|       | 166.24 ± 0.01      | 0.92 ± 0.03     | 166.31 ± 0.04                      | 1.00                            |
|       | 167.77 ± 0.03      | 2.00            | 167.50 ± 0.01                      | 1.80 ± 0.15                     |
|       | 169.19 ± 0.09      | 2.00            | 169.03 ± 0.05                      | 1.80 ± 0.15                     |

\* = not detected

**Table S2** Atomic Concentrations from XPS Core Level Fits (At. %)

|                         | C          | Cl        | N         | O          | S          | Pd        |
|-------------------------|------------|-----------|-----------|------------|------------|-----------|
| r-PEDOT                 | 62.2 ± 0.7 | *         | 1.0 ± 0.1 | 30.5 ± 0.7 | 6.28 ± 0.2 | *         |
| PdO <sub>x</sub> /PEDOT | 57 ± 2     | 2.2 ± 0.5 | 1.7 ± 0.4 | 31 ± 1     | 5.5 ± 0.4  | 3.0 ± 0.8 |

\* = not detected

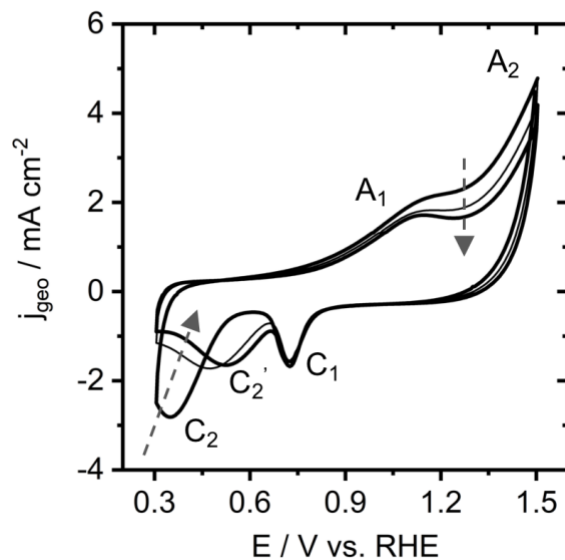

**Fig. S4** CV scans of the PdO<sub>x</sub>/PEDOT film on GC in Ar-saturated 0.1 M KOH with anodic switching potential of 1.5 V vs. RHE. See main text for assignment and discussion of the C<sub>1</sub>/A<sub>1</sub> and C<sub>2</sub> processes (Fig. 1c). Extending the anodic switching potential to 1.5 V vs. RHE results in the onset of irreversible anodic current at ~1.4 V vs. RHE (A<sub>2</sub>), corresponding to concomitant oxygen evolution and oxidation of Pd to Pd<sup>4+</sup>.<sup>4</sup> In the cathodic scan, C<sub>1</sub> is shifted positive to 0.7 V vs. RHE, and the C<sub>2</sub> wave is again observed at 0.3 V vs. RHE in the first scan and stabilizes at a potential of 0.5 V vs. RHE in subsequent cycles (C<sub>2</sub><sup>'</sup>).

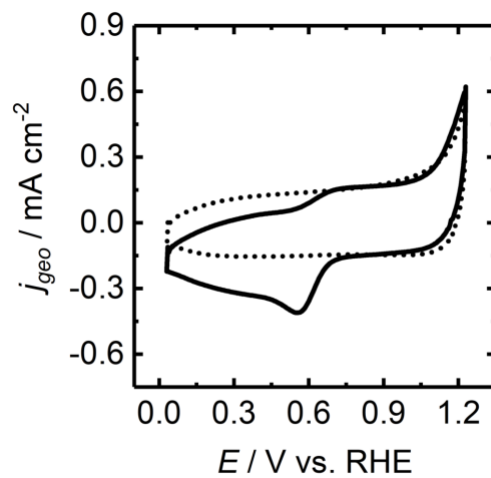

**Fig. S5** CV scans of a r-PEDOT film deposited on a GC RRDE electrode in Ar-saturated (dotted line) and O<sub>2</sub>-saturated (solid line) 0.1 M KOH.

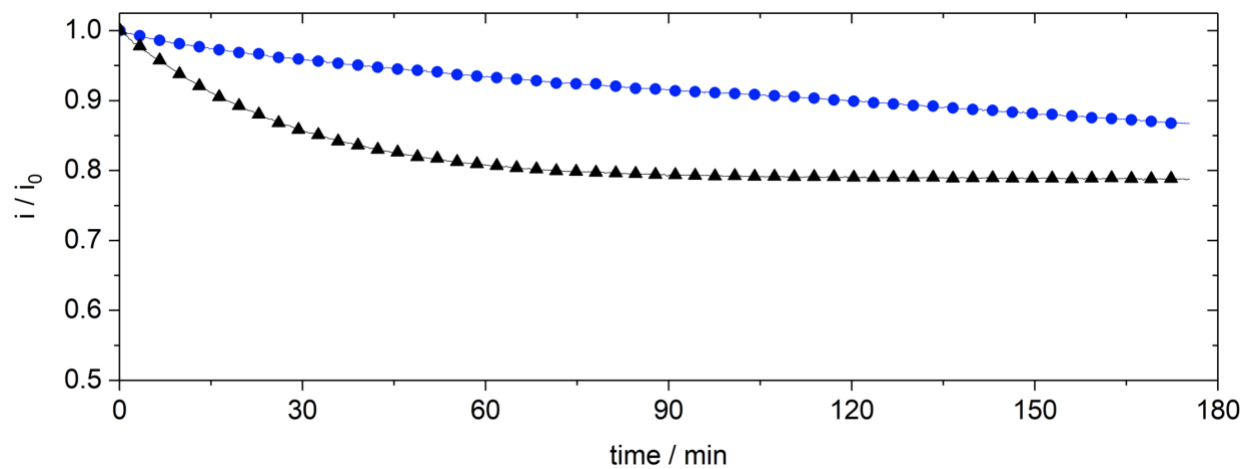

**Fig. S6** Chronoamperometric response of the PdO<sub>x</sub>/PEDOT (blue circles) and 20% Pt/C (black triangles) films during controlled potential electrolysis at 0.8 V vs. RHE in continuously O<sub>2</sub>-purged 0.1 M KOH electrolyte for three hours.

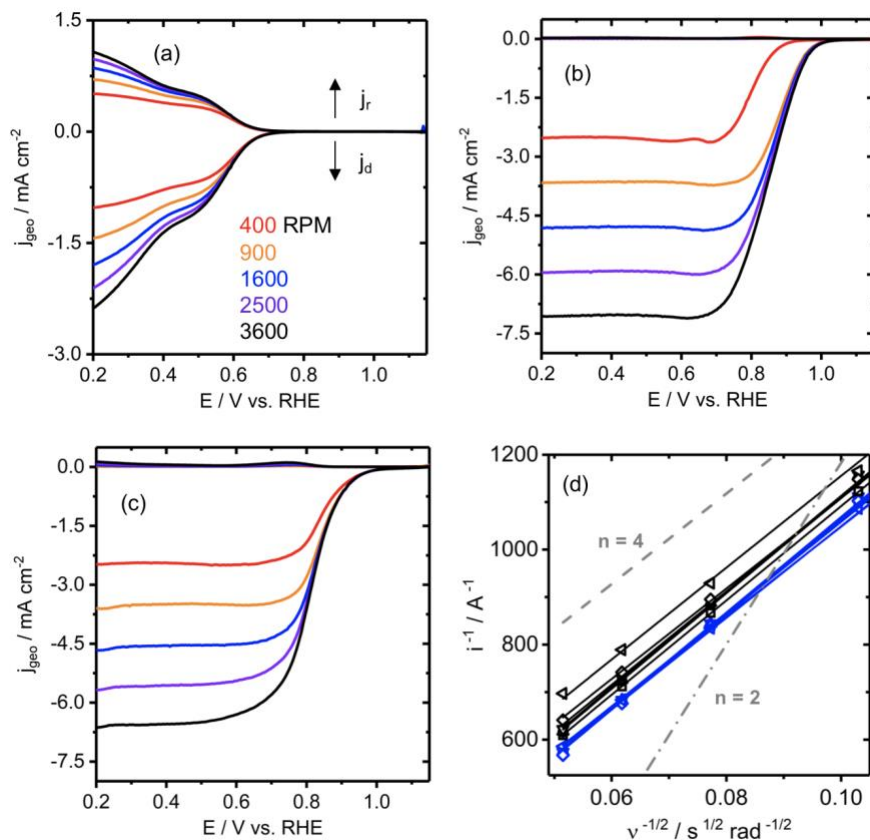

**Fig. S7** ORR LSVs (ring and disk current densities) measured by RRDE at increasing rotation rates from 400 RPM to 3600 RPM in 0.1 M KOH electrolyte for the r-PEDOT (a), PdO<sub>x</sub>/PEDOT (b), and 20% Pt/C (c) films; (d) Koutecky-Levich plots and linear fits for PdO<sub>x</sub>/PEDOT (blue) and 20% Pt/C (black) over the potential range of 0.2 V to 0.7 V vs. RHE and example slopes corresponding with  $n = 2$  and  $n = 4$  ORR processes.

**Table S3** ORR Activity Comparison with Relevant Literature Reports on Pd-based Electrocatalysts in 0.1 M KOH

|                         | Ref.      | $E_{\text{onset}} /$<br>V vs. RHE | $E_{1/2} /$<br>V vs. RHE | $j_k /$<br>$\text{mA cm}^{-2}_{\text{ECSA}}$                | $j_k /$<br>$\text{mA } \mu\text{g}^{-1}_{\text{Pd}}$        | $n / e^-$ |
|-------------------------|-----------|-----------------------------------|--------------------------|-------------------------------------------------------------|-------------------------------------------------------------|-----------|
| PdO <sub>x</sub> /PEDOT | this work | 0.98                              | 0.86                     | 6.03 <sup>a</sup><br>1.93 <sup>b</sup><br>0.65 <sup>c</sup> | 1.99 <sup>a</sup><br>0.64 <sup>b</sup><br>0.22 <sup>c</sup> | 3.97      |
| Pd/C-AR                 | 3         | NR                                | NR                       | 0.14 <sup>c</sup>                                           | 0.08 <sup>c</sup>                                           | 3.9       |
| Pd/C-300                |           |                                   |                          | 0.17 <sup>c</sup>                                           | 0.09 <sup>c</sup>                                           | 3.7       |
| Pd/C-400                |           |                                   |                          | 0.2 <sup>c</sup>                                            | 0.10 <sup>c</sup>                                           | 3.9       |
| Pd/C-500                |           |                                   |                          | 0.23 <sup>c</sup>                                           | 0.07 <sup>c</sup>                                           | 3.7       |
| Pd/C-600                |           |                                   |                          | 0.39 <sup>c</sup>                                           | 0.05 <sup>c</sup>                                           | 3.9       |
| PdO/C-0.5h              | 5         | 0.95                              | 0.84                     | 2.00 <sup>b</sup>                                           | 0.15 <sup>b</sup>                                           | 3.8-3.96  |
| PdO/C-1h                |           |                                   |                          | 2.69 <sup>b</sup>                                           | 0.18 <sup>b</sup>                                           | 3.88-3.97 |
| PdO/C-2h                |           |                                   |                          | 1.40 <sup>b</sup>                                           | 0.36 <sup>b</sup>                                           | 3.92-3.97 |
| PdO/C-4h                |           |                                   |                          | 2.64 <sup>b</sup>                                           | 1.11 <sup>b</sup>                                           | 3.91-3.99 |
| PdO/C-8h                |           |                                   |                          | 1.27 <sup>b</sup>                                           | 0.72 <sup>b</sup>                                           | 3.91-3.99 |
| PdSph-20                | 6         | NR                                | NR                       | $0.15 \pm 0.08^c$                                           | $0.10 \pm 0.01^c$                                           | NR        |
| PdCub3-20               |           |                                   |                          | $0.37 \pm 0.10^c$                                           | $0.09 \pm 0.02^c$                                           |           |
| PdCub2-20               |           |                                   |                          | $0.42 \pm 0.05^c$                                           | $0.06 \pm 0.01^c$                                           |           |
| PdCub1-50               |           |                                   |                          | $0.50 \pm 0.08^c$                                           | $0.04 \pm 0.01^c$                                           |           |
| PdCub1-20               |           |                                   |                          | $0.55 \pm 0.08^c$                                           | $0.06 \pm 0.01^c$                                           |           |
| Pd/CNS-10%              | 7         | 0.91                              | NR                       | 0.11 <sup>d</sup>                                           | 0.17 <sup>d</sup>                                           | 3.86-3.98 |
| Pd/CNS-15%              |           |                                   |                          | 0.13 <sup>d</sup>                                           | 0.2 <sup>d</sup>                                            |           |
| Pd/CNS-20%              |           |                                   |                          | 0.16 <sup>d</sup>                                           | 0.29 <sup>d</sup>                                           |           |
| Pd/CNS-25%              |           |                                   |                          | 0.12 <sup>d</sup>                                           | 0.22 <sup>d</sup>                                           |           |
| Pd/PEDOT/rGO            | 8         | 0.98                              | NR                       | $\sim 3.25^a$                                               | $\sim 1.2^a$                                                | 3.7       |

<sup>a</sup> 0.8 V vs. RHE, <sup>b</sup> 0.85 V vs. RHE, <sup>c</sup> 0.9 V vs. RHE, <sup>d</sup> potential not specified.

## References

1. M. Łukaszewski, M. Soszko and A. Czerwiński, *Int. J. Electrochem. Sci.*, 2016, **11**, 4442-4469.
2. D. J. Davis, T. N. Lambert, J. A. Vigil, M. A. Rodriguez, M. T. Brumbach, E. N. Coker and S. J. Limmer, *J. Phys. Chem. C*, 2014, **118**, 17342-17350.
3. L. Jiang, A. Hsu, D. Chu and R. Chen, *J. Electrochem. Soc.*, 2009, **156**, B643-B649.
4. M. Grdeń, M. Łukaszewski, G. Jerkiewicz and A. Czerwiński, *Electrochim. Acta*, 2008, **53**, 7583-7598.
5. Q. Wu, Z. Rao, L. Yuan, L. Jiang, G. Sun, J. Ruan, Z. Zhou and S. Sang, *Electrochim. Acta*, 2014, **150**, 157-166.
6. M. Lüsi, H. Erikson, A. Sarapuu, K. Tammeveski, J. Solla-Gullón and J. M. Feliu, *Electrochem. Commun.*, 2016, **64**, 9-13.
7. W. Yan, Z. Tang, L. Li, L. Wang, H. Yang, Q. Wang, W. Wu and S. Chen, *ChemElectroChem*, 2017, **4**, 1349-1355.
8. J. E. Choe, M. S. Ahmed and S. Jeon, *J. Power Sources*, 2015, **281**, 211-218.
